# Supplementary material
Source: PubMed Central journal article supplement (PMC4354262)
Supplement: ncomms6932-s1.pdf [file ncomms6932-s1.pdf]

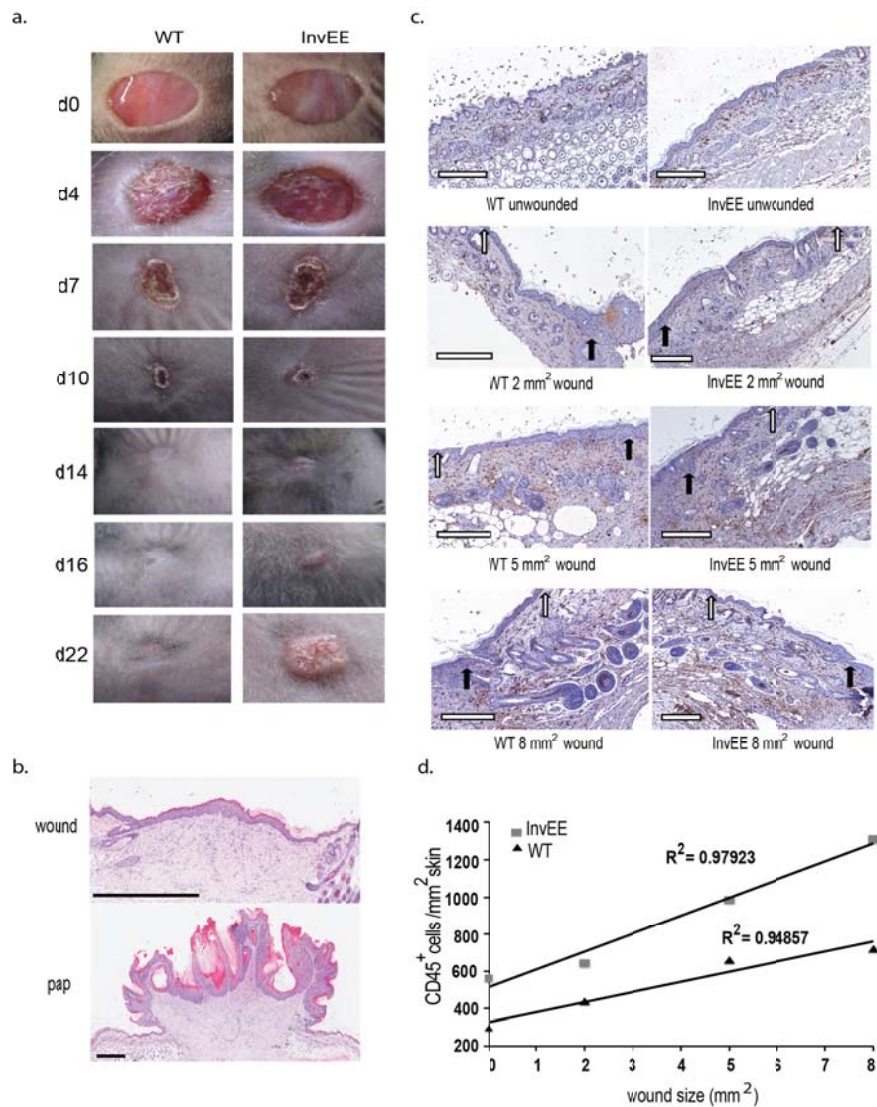

**Supplementary Figure 1: Effect of wound size on inflammatory infiltrate**  
**(a)** Macroscopic images of WT and InvEE 8 mm<sup>2</sup> wounds at day 0, 4, 7, 10, 14, 16 and 22 post-wounding. **(b)** Haematoxylin-eosin stained sections of a healed wound and papilloma (pap) 30 days after wounding. Scale bars: 1 mm. **(c)** Representative images of CD45 stained skin during healing of different sized wounds. CD45<sup>+</sup> cells were quantified in the region between the arrows. Black arrows indicate wound edges. Scale bars: 300  $\mu$ m. **(d)** Correlation between wound size and number of CD45<sup>+</sup> leukocytes in wound beds of healed InvEE and WT skin. Mice were harvested at time of wound closure ( $n \geq 4$  mice per condition, at least 3 microscopic fields were quantified per mouse).

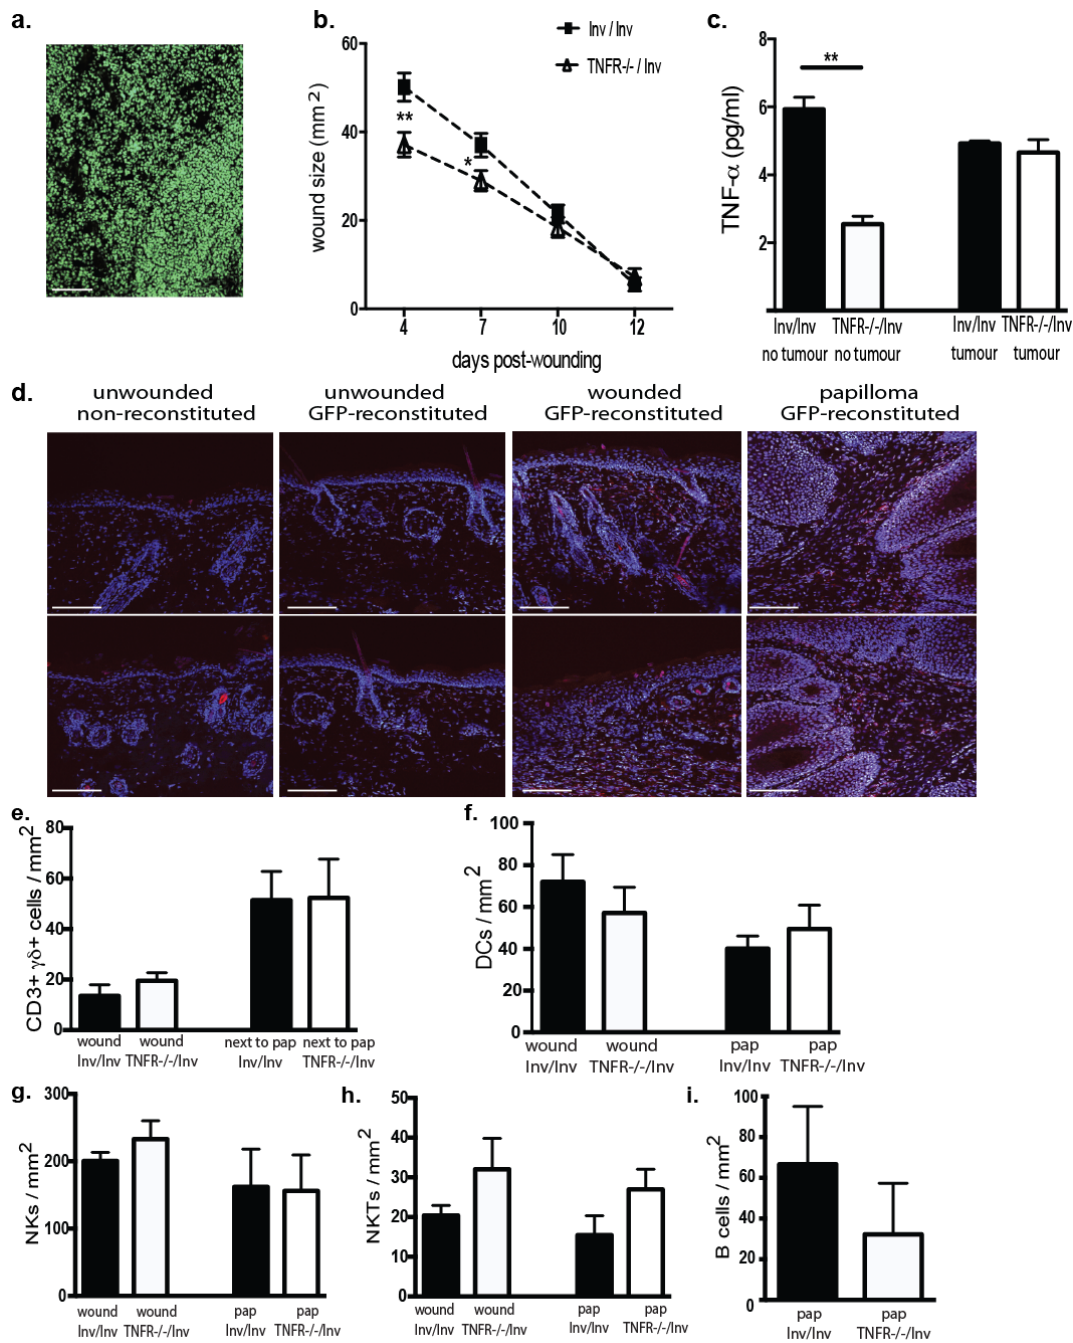

**Supplementary Figure 2: Bone marrow reconstitution and immune cell infiltration** (a) Y-chromosome in situ hybridization (green) on spleen of female mouse reconstituted with male BM collected 6 weeks after reconstitution. Scale bar, 100µm. (b) Wound healing dynamics in TNFR<sup>-/-</sup> and control BM chimeras (n=12 mice per condition; \* 0.01<p<0.05, \*\* 0.01<p<0.001; unpaired t-test). (c) Serum levels of TNF-α in TNFR<sup>-/-</sup> and control BM chimeras with or without wound-induced papillomas (n=4 mice per condition; \*\* 0.01<p<0.001; Mann-Whitney U-test). (d) Labeling of F4/80 (red)

macrophages in non-reconstituted irradiated mice (24h after irradiation) or mice reconstituted with BM from mice that express eGFP (green) under control of the  $\beta$ -actin CMV promoter. DAPI nuclear counterstain is shown in blue. Scale bars, 200  $\mu$ m. **(e)** Quantification of  $\gamma\delta$  T-cells (double labeled with anti- $\gamma\delta$  TCR and anti-CD3 antibodies) in wound beds or skin adjacent to papillomas. **(f)** Quantification of dendritic cells (double labeled with anti-CD11c and anti-CD207 antibodies) in wound beds and tumour stroma. **(g, h)** Quantification of NK (labeled with anti-NK1.1) and NK T-cells (double labeled with anti-NK1.1 and anti-CD3 antibodies). **(i)** Quantification of B cells (labeled with anti-CD19 antibodies) in tumour stroma. **(e-i)** Quantification was performed on  $\geq 3$  mice per condition, and at least 3 fields were counted per section analysed. Graphs represent means  $\pm$  SEM.

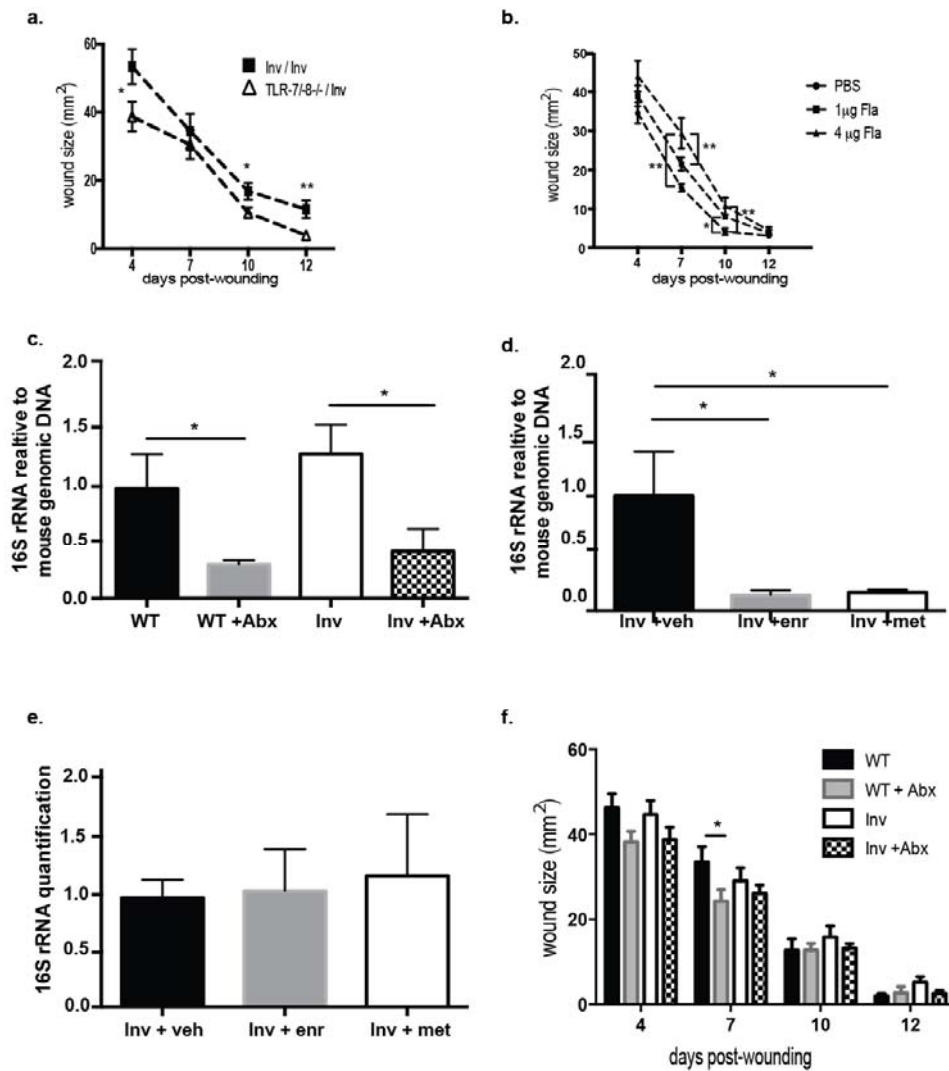

### Supplementary Figure 3: Wound healing dynamics and bacterial load (a)

Wound healing dynamics in TLR-7/8<sup>-/-</sup> and control BM chimeras (n=12 per condition; \* 0.01<p<0.05, \*\* 0.01<p<0.001; unpaired t-test). **(b)** Wound healing dynamics in InvEE wounds treated with PBS or flagellin (n≥ 8 mice per condition; \*\* 0.01<p<0.001; unpaired t-test). **(c)** 16S rRNA Q-PCR normalized to mouse genomic DNA of skin biopsies collected at time of wounding. Mice had been pre-treated with or without orally administered antibiotics (Abx) for 8 consecutive days (n>4 mice per condition; \* 0.01<p<0.05; Mann-Whitney U-test). **(d, e)** Mice had been topically treated with (enr, met) or without (veh) antibiotics for 8 consecutive days (n>4 mice per condition; \* 0.01<p<0.05; Mann-Whitney U-test). Enr: enrofloxacin; met: methicillin. **(d)** 16S rRNA Q-PCR of skin biopsies normalized to mouse genomic DNA. **(e)** 16S rRNA Q-PCR of faeces collected at the time of

wounding. **(f)** Wound healing dynamics in mice treated with or without antibiotics in the drinking water ( $n > 9$  per condition; \*  $0.01 < p < 0.05$ ; Mann-Whitney U-test). All data are means  $\pm$  SEM.

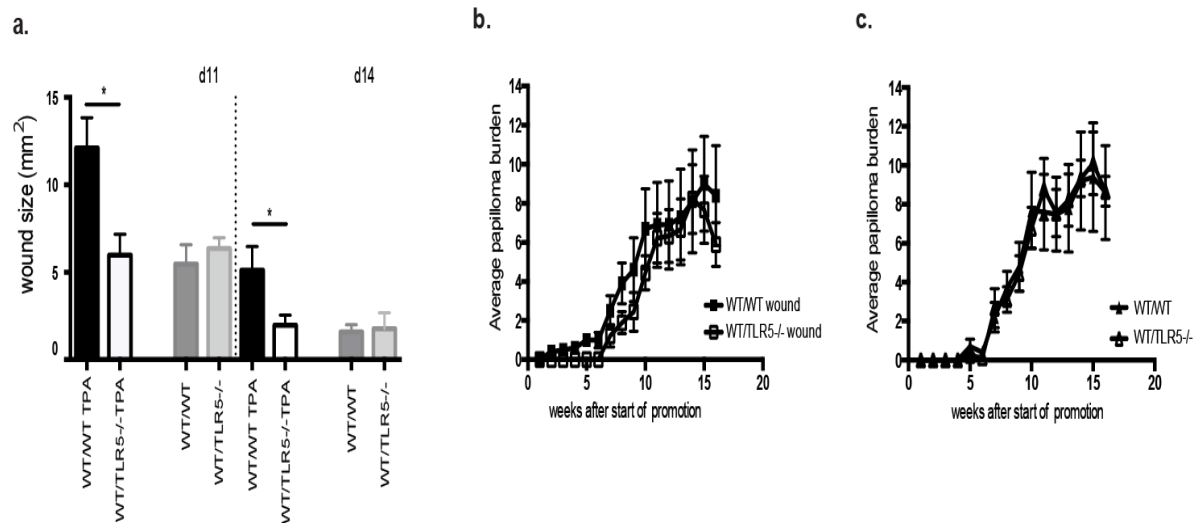

**Supplementary Figure 4: Role of TLR-5 in chemical carcinogenesis (a)**

Wound area in wild-type mice reconstituted with TLR-5<sup>-/-</sup> or control (WT) BM at day 11 and 14 after wounding. Mice that were treated with DMBA and TPA are compared with mice that were treated with DMBA only ( $n > 8$  mice per condition; \*  $0.01 < p < 0.05$ ; unpaired t-test). Data are means  $\pm$  SEM. **(b)** Number of papillomas per mouse in TLR-5<sup>-/-</sup> and control BM chimeras wounded and treated with DMBA/TPA ( $n \geq 9$  mice per condition). Data are means  $\pm$  SEM. **(c)** Number of papillomas per mouse in TLR-5<sup>-/-</sup> and control BM chimeras treated with DMBA/TPA without wounding ( $n \geq 9$  mice per condition). Data are means  $\pm$  SEM.

**Supplementary Table 1: Quantitative PCR primer sets**

| Gene                  | Forward primer        | Reverse primer         |
|-----------------------|-----------------------|------------------------|
| IL-1 $\alpha$         | GGGCTGGTCTTCTCCTTGAG  | TTGGTTAAATGACCTGCAACA  |
| IL-1 $\beta$          | GCTTCCAAACCTTTGACCTG  | CTGTTGTTTCCCAGGAAGAC   |
| TSLP                  | TCTCAGGAGCCTCTTCATCCT | CTCACAGTCCTCGATTTGCTC  |
| TGF- $\alpha$         | TATCACCTGTGTGCTGATCCA | CAAGCAGTCCTTCCCTTCAG   |
| TGF- $\beta$ 1        | ATACGTCAGACATTCGGGAAG | GACGTCAAAGACAGCCACTC   |
| MyD88                 | GTAGACAGGACGGCATCAGAG | CTATACCAACCCTTGACCAA   |
| Bcl-XL                | CTGCTCACTTACTGGGTCTGC | AAGAGGCGGATGAAACAATTC  |
| JNK                   | ATGGGTCTGATTCTGAAATGG | CAGAAGCAAACGTGACAACAA  |
| IRF-3                 | GATGGCTGACTTTGGCATCT  | GGTCCTTGCTATTGTCAGCAG  |
| NF- $\kappa$ B        | GCTGTCACTATCCCGGAGTTC | TCTGGGGGTACCATCAAAGAG  |
| S100A8                | ATCCTTTGTCAGCTCCGTCTT | TGTAGAGGGCATGGTGATTTTC |
| S100A9                | GCTGATTGTCCTGGTTTGTGT | GACAAATGGTGGAAAGCACAGT |
| IL-22                 | AGACAGGTTCCAGCCCTACAT | TCTTCTGGATGTTCTGGTCGT  |
| I $\kappa$ b $\alpha$ | GTTGACATCAGCACCCAAAGT | ACCCCTCTACATCTTGCCTGT  |
| TNFAIP3               | CTTCTGAGGATGTTGCTGAGG | CAGGAATTTGTGGAAACAGGA  |
| MCP-1                 | AGCTCTCTTCTCCTCCACCAC | TGCTGGTGATCCTCTTGTAGC  |
| GAPDH                 | AACATCAAATGGGGTGAGGCC | GTTGTCATGGATGACCTTGGC  |
